# Supplementary material for: Upregulated heme biosynthesis, an exploitable vulnerability in MYCN-driven leukemogenesis
Source: JCI journal article supplement (doi:10.1172/jci.insight.92409), 2017-08-02
Supplement: sd1 [file 1]

## SUPPLEMENTAL FIGURES

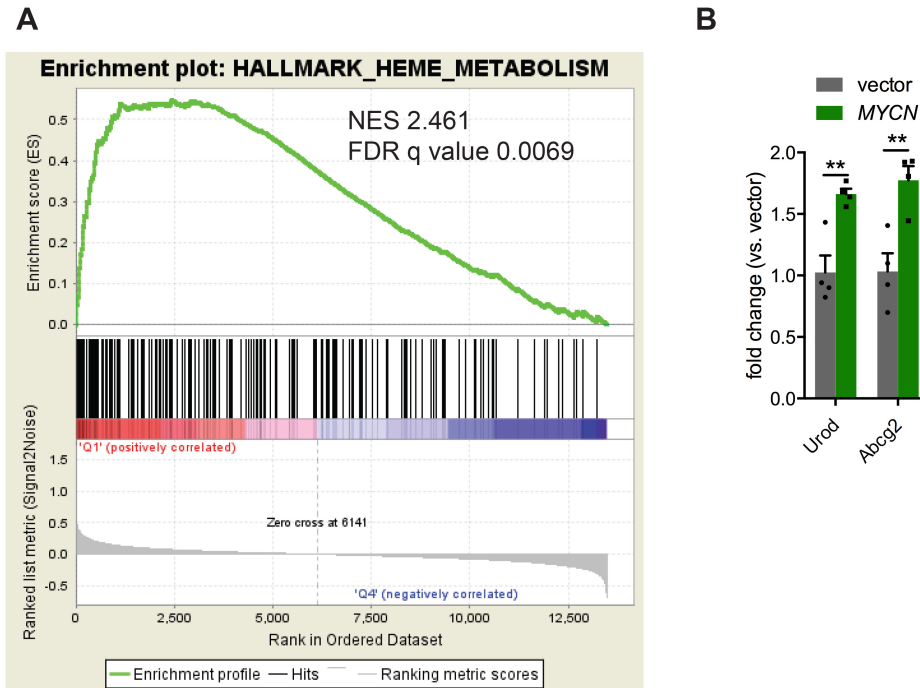

**Supplemental Figure 1. Heme biosynthesis and mitochondrial genes are upregulated by MYCN (related to Figures 1 and 2).** **A)** Geneset enrichment analysis comparing genes upregulated in high *MYCN* expression (first quartile) vs. rest from the SJ AML patient cohort shows enrichment of heme metabolism genes in patients with high *MYCN* expression. **B)** *Urod* and *Abcg2* mRNA levels were determined by qPCR. 2-Way ANOVA was used (\*\*,  $p < 0.01$ )

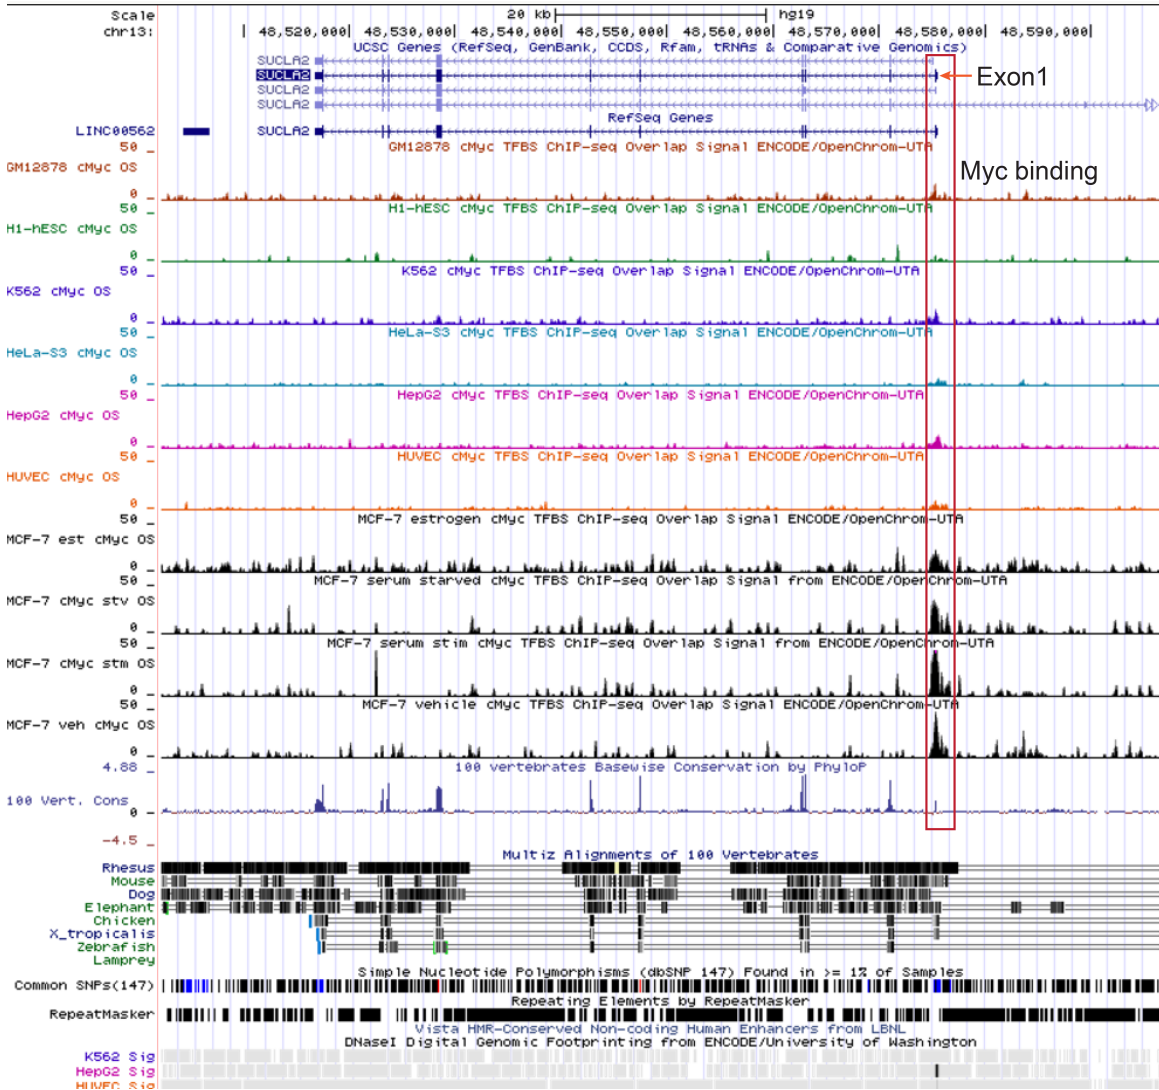

**Supplemental Figure 2. SUCLA2 promoter is bound by MYC (related to Figure 2). A) Promoter and MYCN binding site analysis using ENCODE data from UCSC Genome Browser. The promoter is bound by MYC (shown in the red box) as demonstrated by CHIP-seq data.**

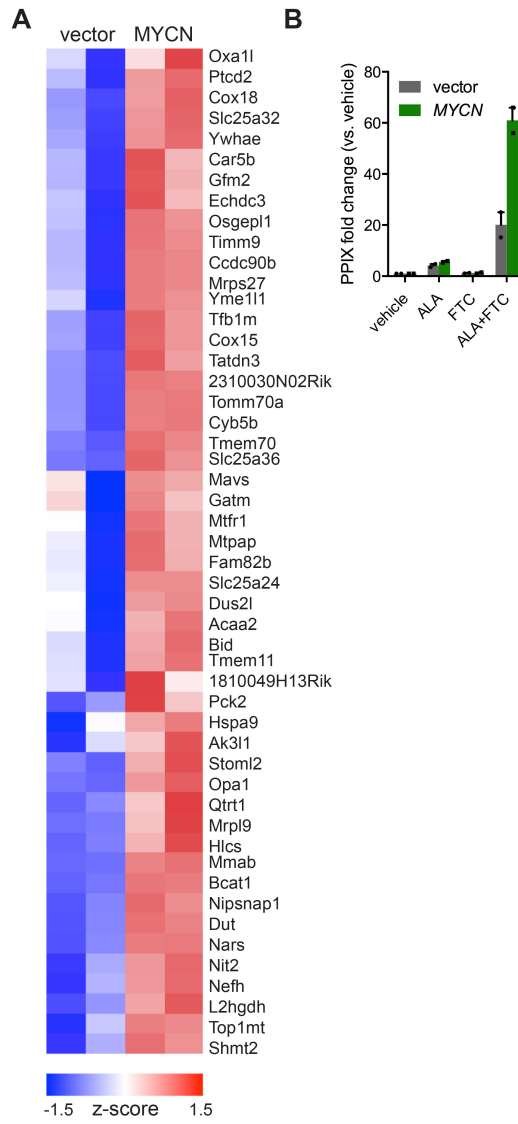

**Supplemental Figure 3. Mitochondrial genes are upregulated by MYCN (related to Figure 2). A)** Heatmap from Fig. 2g is enlarged to include gene names. **B)** Vector- or MYCN transduced HPCs were incubated with vehicle, ALA, and FTC as indicated and intracellular PPIX measured by FACS.

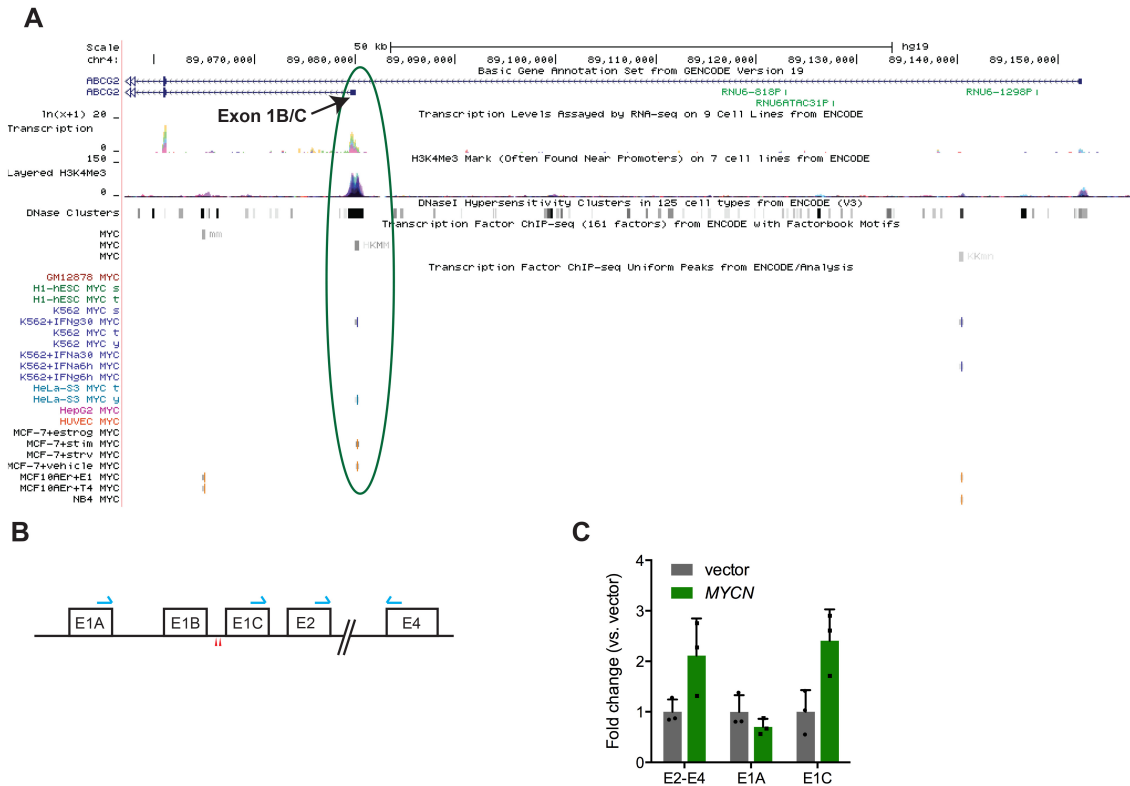

**Supplemental Figure 4. Specific *Abcg2* variant is upregulated by MYCN (related to Figure 3). A)** Promoter and MYCN binding site analysis using ENCODE data from UCSC Genome Browser. **B)** Schematic diagram of *Abcg2* promoter with putative MYCN-binding sites shown with red triangles. Primers used for qPCR is shown with blue arrows. Not drawn to scale. **C)** Levels of different splice variants were measured by qPCR. E2-E4 represents total *Abcg2* transcript.



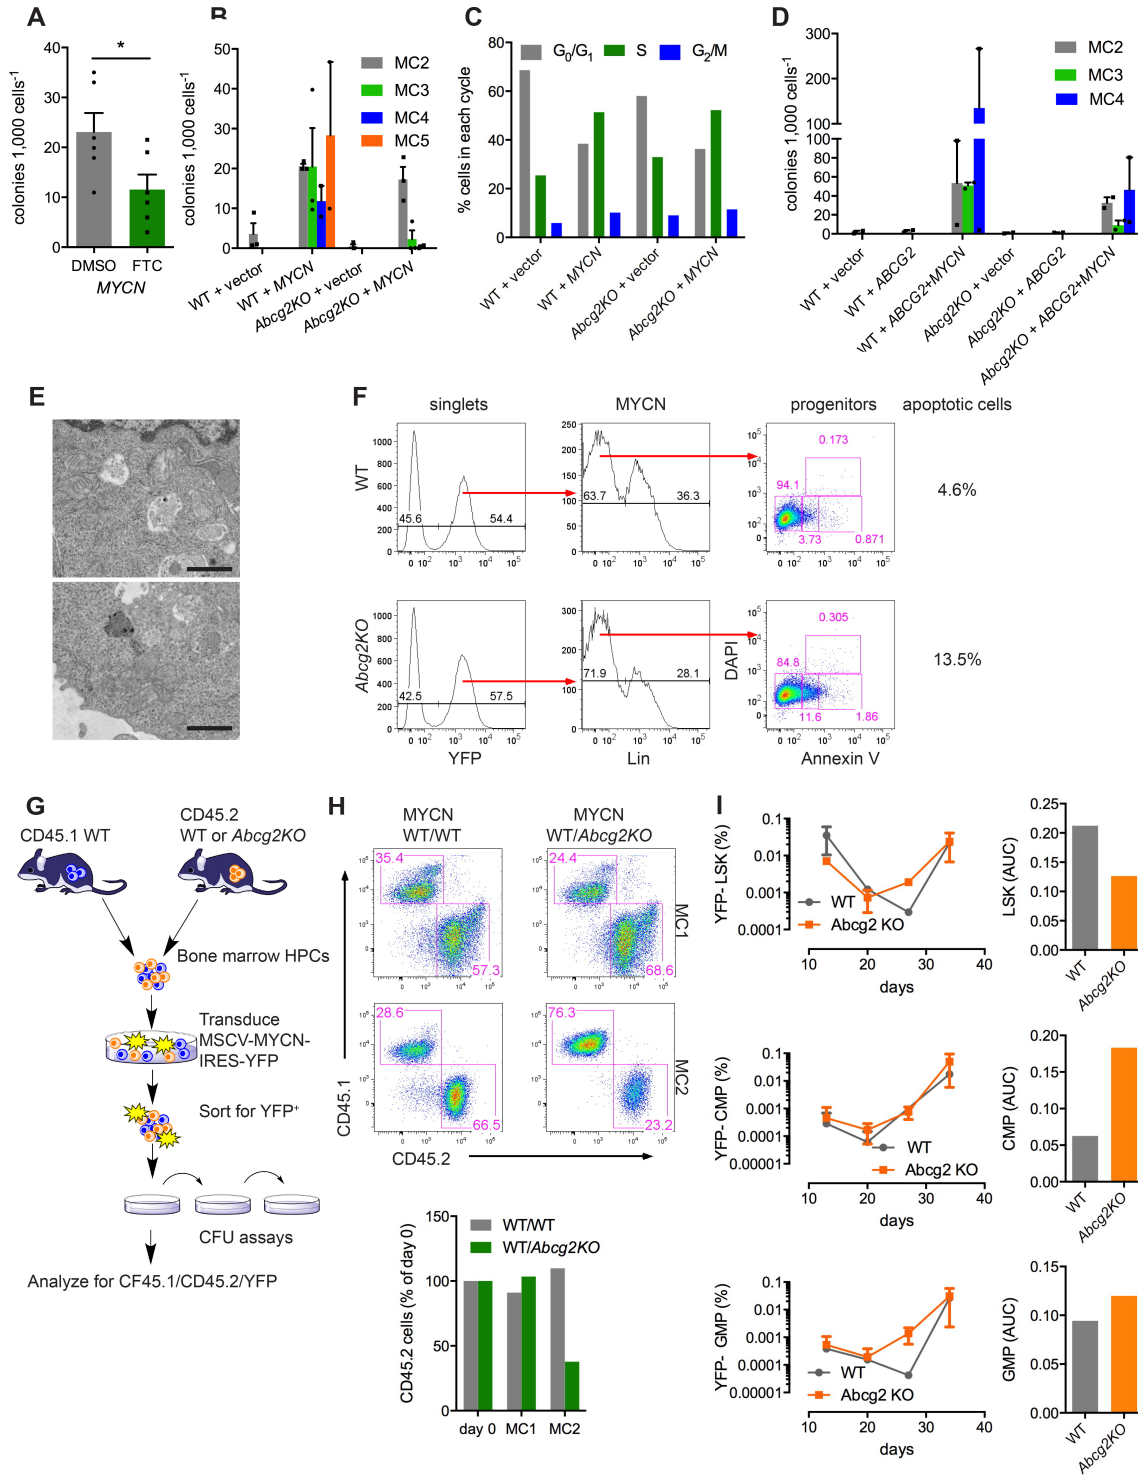

**Supplemental Figure 5. Progenitor self-renewal requires ABCG2 (related to Figure 3).** **A)** MYCN-transduced HPCs were plated using methocult medium in the absence or presence of FTC. **B)** HPCs isolated from WT or *Abcg2KO* mice were transduced with vector or MYCN and serially replated on methocult to assess self-renewal. **C)** HPCs isolated from WT or *Abcg2KO* mice were transduced with vector or MYCN and cell cycle was measured by FACS. **D)** HPCs isolated from WT or *Abcg2KO* mice were transduced with vector or MYCN in combination with ABCG2 and serially replated on methocult to assess self-renewal. HPCs isolated from **E)** WT or *Abcg2KO* mice were transduced with MYCN, fixed and

processed for EM. **F)** Progenitors from methocult (MC1) culture were analyzed for apoptosis by FACS. **G)** Schematic drawing of the experiment to assess whether the defect in *Abcg2KO* MYCN HPCs are intrinsic or extrinsic. **H)** HPCs harvested from CD45.1 WT and CD45.2 WT or *Abcg2KO* were transduced with MYCN and serially replated on methocult. Colonies from methocult cultures were harvested and analyzed by FACS for CD45.1 and CD45.2 antigen. Frequency of CD45.1 and CD45.2 cells was normalized to the value from day 0. **I)** WT or *Abcg2KO* HPCs were transduced with MYCN and transplanted into lethally irradiated congenic recipient mice. Bone marrow cells were harvested at indicated time points and analyzed for hematopoietic progenitors using FACS. YFP<sup>+</sup> (MYCN<sup>+</sup>) LSK, CMP and GMP populations are shown.

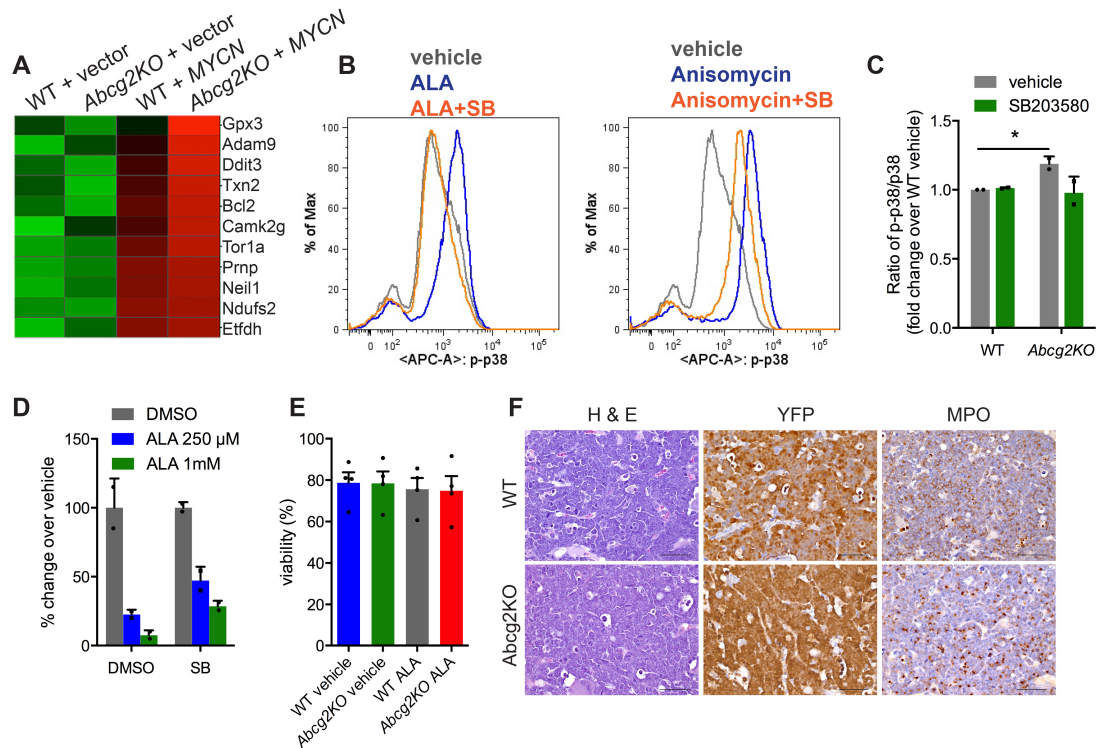

**Supplemental Figure 6. PPIX toxicity is partially mediated by ROS and p38 (related to Figure 4).** **A)** *Abcg2KO* MYCN-MC1 cells exhibit upregulation in ROS genes. **B)** MYCN-HPCs were incubated with ALA, p38 inhibitor, SB203580, or anisomycin as indicated. The cells were fixed, permeabilized, stained for phospho-p38 and analyzed by FACS. **C)** WT or *Abcg2KO* MYCN-HPCs were fixed, permeabilized, stained for total and phospho-p38 and analyzed by FACS. **D)** p38 inhibition by SB203580 partially rescued ALA toxicity in CFU-C assays. **E)** WT or *Abcg2KO* HPCs were transduced with MYCN, incubated with vehicle or ALA overnight and analyzed for viability by FACS. **F)** WT or *Abcg2KO* HPCs were transduced with MYCN and transplanted into lethally irradiated congenic recipient mice. Mice succumbing to leukemia were fixed in formalin, paraffin-embedded and histology slides prepared. Slides were stained with H&E, or antibodies to GFP (which also recognizes YFP) and myeloperoxidase (MPO).

**Supplemental Table 1. Analysis of Patient characteristics with UROD expression**

| Response to therapy | Favorable(1) | Favorable | Favorable | Intermediate | Poor    | Normal Karyotype |
|---------------------|--------------|-----------|-----------|--------------|---------|------------------|
| Lesion              | t(15;17)     | t(8;21)   | PML-RARa  | MLL          | Ch7loss |                  |
| UROD>median         | 6            | 3         | 7         | 2            | 4       | 23               |
| UROD<median         | 4            | 6         | 5         | 5            | 6       | 17               |

**Supplemental Table 2. Hematopoietic stem cell genes in WT or *Abcg2KO*-vector, MYCN HPCs (related to Figure 3).** Last four columns highlighted in blue are log ratio.

| Probe set 430v2<br>PM | Gene<br>symbol | KO<br>vec<br>avg | KO<br>MYCN<br>avg | WT<br>vec<br>avg | WT<br>MYCN<br>avg | MYCN WT vs<br>KO (>2-fold<br>with<br>FDR<0.05) | LPE<br>vec<br>KO<br>vs.<br>WT | LPE<br>MYCN<br>KO vs.<br>WT | LPE<br>KO<br>vec vs.<br>MYCN | LPE<br>WT<br>vec vs.<br>MYCN |
|-----------------------|----------------|------------------|-------------------|------------------|-------------------|------------------------------------------------|-------------------------------|-----------------------------|------------------------------|------------------------------|
| 1428816_PM_a_at       | Gata2          | 8.77             | 9.53              | 8.64             | 9.70              | Increased                                      | 0.14                          | -0.17                       | 0.76                         | 1.06                         |
| 1450333_PM_a_at       | Gata2          | 8.83             | 9.57              | 9.10             | 9.50              | Not significant                                | -0.27                         | 0.07                        | 0.74                         | 0.41                         |
| 1417679_PM_at         | Gfi1           | 4.69             | 5.87              | 5.43             | 5.44              | Not significant                                | -0.74                         | 0.43                        | 1.19                         | 0.02                         |
| 1420399_PM_at         | Gfi1b          | 5.34             | 4.67              | 5.06             | 5.07              | Not significant                                | 0.29                          | -0.40                       | -0.68                        | 0.01                         |
| 1448733_PM_at         | Bmi1           | 5.73             | 5.19              | 5.73             | 5.58              | Not significant                                | -0.01                         | -0.40                       | -0.54                        | -0.15                        |
| 1417493_PM_at         | Bmi1           | 7.67             | 7.06              | 7.41             | 7.35              | Not significant                                | 0.26                          | -0.30                       | -0.61                        | -0.06                        |
| 1454086_PM_a_at       | Lmo2           | 9.17             | 8.49              | 9.06             | 8.36              | Not significant                                | 0.11                          | 0.13                        | -0.68                        | -0.70                        |
| 1440878_PM_at         | Runx1          | 7.78             | 7.26              | 7.51             | 7.35              | Not significant                                | 0.27                          | -0.10                       | -0.52                        | -0.16                        |
| 1422864_PM_at         | Runx1          | 9.01             | 8.75              | 8.88             | 8.91              | Not significant                                | 0.14                          | -0.16                       | -0.27                        | 0.03                         |
| 1422865_PM_at         | Runx1          | 6.06             | 6.15              | 5.99             | 6.54              | Not significant                                | 0.08                          | -0.39                       | 0.09                         | 0.55                         |
| 1427650_PM_a_at       | Runx1          | 7.09             | 8.18              | 7.11             | 7.92              | Not significant                                | -0.02                         | 0.27                        | 1.09                         | 0.81                         |
| 1452530_PM_a_at       | Runx1          | 4.61             | 5.34              | 4.63             | 5.30              | Not significant                                | -0.03                         | 0.05                        | 0.74                         | 0.67                         |
| 1452531_PM_at         | Runx1          | 4.02             | 4.00              | 4.44             | 4.27              | Not significant                                | -0.42                         | -0.27                       | -0.02                        | -0.18                        |
| 1439107_PM_a_at       | Mll5           | 8.19             | 7.70              | 8.07             | 7.92              | Not significant                                | 0.12                          | -0.22                       | -0.49                        | -0.15                        |
| 1439108_PM_at         | Mll5           | 8.72             | 8.13              | 8.45             | 8.24              | Not significant                                | 0.27                          | -0.11                       | -0.59                        | -0.21                        |
| 1457193_PM_at         | Mll3           | 5.64             | 4.44              | 5.65             | 4.67              | Not significant                                | -0.01                         | -0.24                       | -1.21                        | -0.98                        |
| 1427150_PM_at         | Mll3           | 6.96             | 5.86              | 7.00             | 6.06              | Not significant                                | -0.04                         | -0.20                       | -1.10                        | -0.94                        |
| 1427236_PM_a_at       | Mll5           | 8.66             | 8.18              | 8.45             | 8.17              | Not significant                                | 0.21                          | 0.02                        | -0.48                        | -0.28                        |
| 1427283_PM_at         | Mll1           | 6.09             | 5.58              | 6.39             | 5.44              | Not significant                                | -0.30                         | 0.14                        | -0.51                        | -0.95                        |
| 1427555_PM_at         | Mll2           | 3.40             | 3.29              | 3.68             | 3.26              | Not significant                                | -0.28                         | 0.03                        | -0.11                        | -0.42                        |
| 1434704_PM_at         | Mll5           | 8.42             | 8.13              | 8.23             | 8.13              | Not significant                                | 0.19                          | 0.00                        | -0.29                        | -0.10                        |
| 1452377_PM_at         | Mll1           | 5.65             | 4.89              | 4.86             | 4.87              | Not significant                                | 0.79                          | 0.02                        | -0.76                        | 0.01                         |
| 1432601_PM_at         | Mll5           | 3.08             | 2.87              | 3.12             | 2.82              | Not significant                                | -0.04                         | 0.06                        | -0.21                        | -0.30                        |
| 1434178_PM_at         | Mll3           | 8.03             | 7.21              | 7.95             | 7.28              | Not significant                                | 0.08                          | -0.07                       | -0.82                        | -0.68                        |
| 1434179_PM_at         | Mll3           | 7.07             | 6.57              | 6.70             | 6.55              | Not significant                                | 0.37                          | 0.02                        | -0.50                        | -0.16                        |
| 1416880_PM_at         | Mcl1           | 9.80             | 9.62              | 9.52             | 9.59              | Not significant                                | 0.29                          | 0.03                        | -0.18                        | 0.08                         |
| 1416881_PM_at         | Mcl1           | 10.00            | 9.99              | 9.70             | 9.99              | Not significant                                | 0.30                          | -0.01                       | -0.01                        | 0.29                         |
| 1437527_PM_x_at       | Mcl1           | 11.20            | 10.80             | 11.03            | 10.74             | Not significant                                | 0.17                          | 0.06                        | -0.40                        | -0.29                        |
| 1448503_PM_at         | Mcl1           | 11.44            | 11.21             | 11.31            | 11.25             | Not significant                                | 0.13                          | -0.04                       | -0.23                        | -0.06                        |
| 1456243_PM_x_at       | Mcl1           | 10.62            | 10.29             | 10.46            | 10.15             | Not significant                                | 0.17                          | 0.14                        | -0.33                        | -0.31                        |
| 1456381_PM_x_at       | Mcl1           | 10.08            | 9.51              | 10.08            | 9.61              | Not significant                                | 0.01                          | -0.10                       | -0.57                        | -0.47                        |
| 1449389_PM_at         | Tal1           | 8.30             | 8.20              | 8.39             | 8.16              | Not significant                                | -0.09                         | 0.04                        | -0.10                        | -0.23                        |
| 1450517_PM_at         | Tal2           | 3.76             | 2.74              | 3.37             | 2.62              | Not significant                                | 0.39                          | 0.12                        | -1.02                        | -0.75                        |

## Reference

1. Ferrara F, and Schiffer CA. Acute myeloid leukaemia in adults. *Lancet*. 2013;381(9865):484-95.
